# Supplementary material for: Enhancing the performance and stability of carbon-based perovskite solar cells by the cold isostatic pressing method
Source: Royal Society of Chemistry journal article supplement (doi:10.1039/c7ra07579k), 2017-01-01
Supplement: c7ra07579k1.pdf [file c7ra07579k1.pdf]

### Supplementary Information

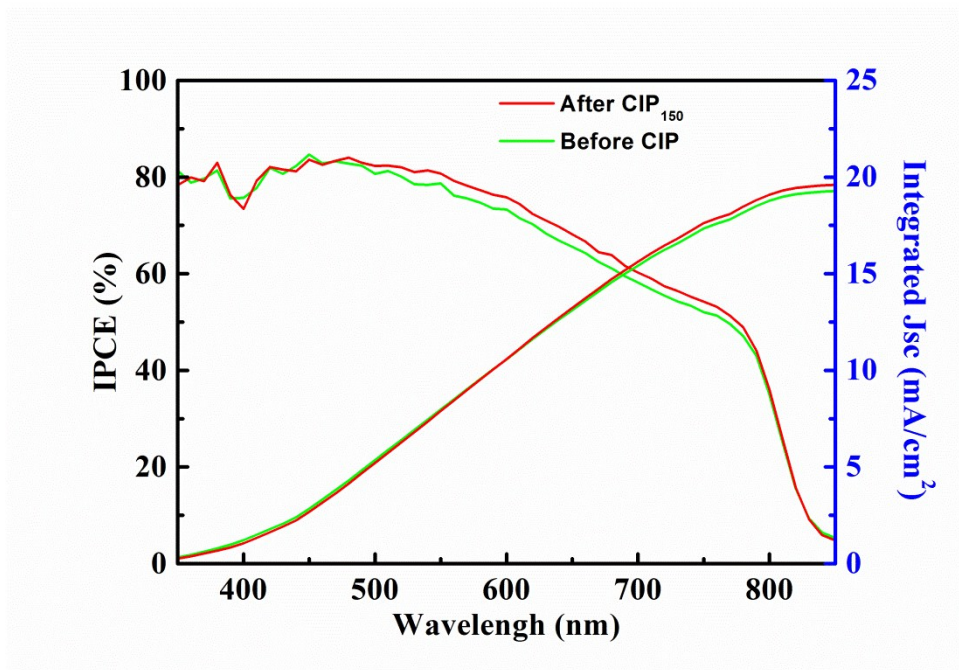

Fig. S1 IPCE spectra of the champion cell before and after CIP treatment.

The photocurrent density of the champion device was checked by IPCE spectra. As shown in figure S1, the  $\text{FA}_x\text{MA}_{1-x}\text{PbI}_3$  based cell generates a photocurrent up to 840 nm, indicating the existence of  $\text{FAPbI}_3$  perovskite in the device. The integration of the IPCE spectra of the champion device with  $\text{CIP}_{150}$  treatment gives  $19.5 \text{ mA/cm}^2$ , which is in rather good agreement with the  $J_{\text{sc}}$  obtained from the J-V curve.
